# Supplementary material for: Guest dependent dielectric properties of nickel(ii)-based supramolecular networks
Source: Royal Society of Chemistry journal article supplement (doi:10.1039/c4ce00218k), 2014-01-01
Supplement: c4ce00218k1.pdf [file c4ce00218k1.pdf]

# Supporting Information

## Guest Dependent Dielectric Properties of Nickel(II)-Based Supramolecular Networks

Shruti Mendiratta,<sup>a,b,c</sup> Muhammad Usman,<sup>a</sup> Tzuoo-Tsair Luo,<sup>a</sup> Shang-Fan Lee,<sup>d</sup>  
Ying-Chih Lin<sup>\*b</sup> and Kuang-Lieh Lu<sup>\*a</sup>

<sup>a</sup>*Institute of Chemistry, Academia Sinica, Taipei 115, Taiwan*

*E-mail: kllu@gate.sinica.edu.tw, Tel: +886-2-27898518*

<sup>b</sup>*Department of Chemistry, National Taiwan University, Taipei 106, Taiwan*

<sup>c</sup>*Taiwan International Graduate Program, Nanoscience and Technology Program, Institute of Physics, Academia Sinica, Taipei 115, Taiwan*

<sup>d</sup>*Institute of Physics, Academia Sinica, Taipei 115, Taiwan*

### Contents

- 1) **Scheme S1** Coordination modes of H<sub>2</sub>bbim.
- 2) **Fig. S1** FTIR spectra of compounds **1** and **2**.
- 3) **Fig. S2** Hydrogen bonding interactions in compound **1**.
- 4) **Fig. S3** Magnified view of the TGA curve for compound **1**.
- 5) **Fig. S4** PXRD patterns of compounds **1** and **2**.
- 6) **Fig. S5** Variation of dielectric constant in **2** on dehydration.
- 7) **Tables S1** and **S2** Bond lengths and angles around Ni(II) ion in compounds **1** and **2**.

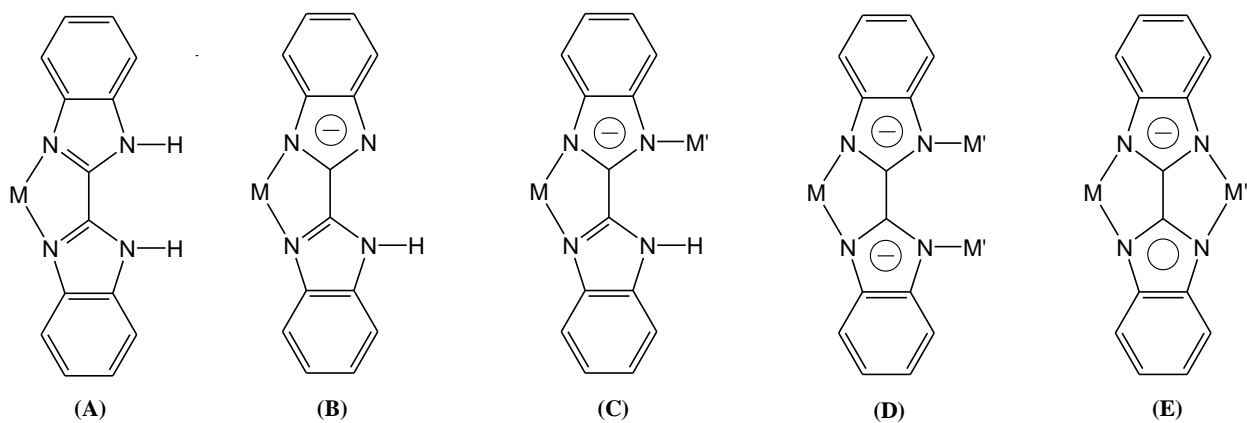

**Scheme S1** Coordination modes of H<sub>2</sub>bbim.

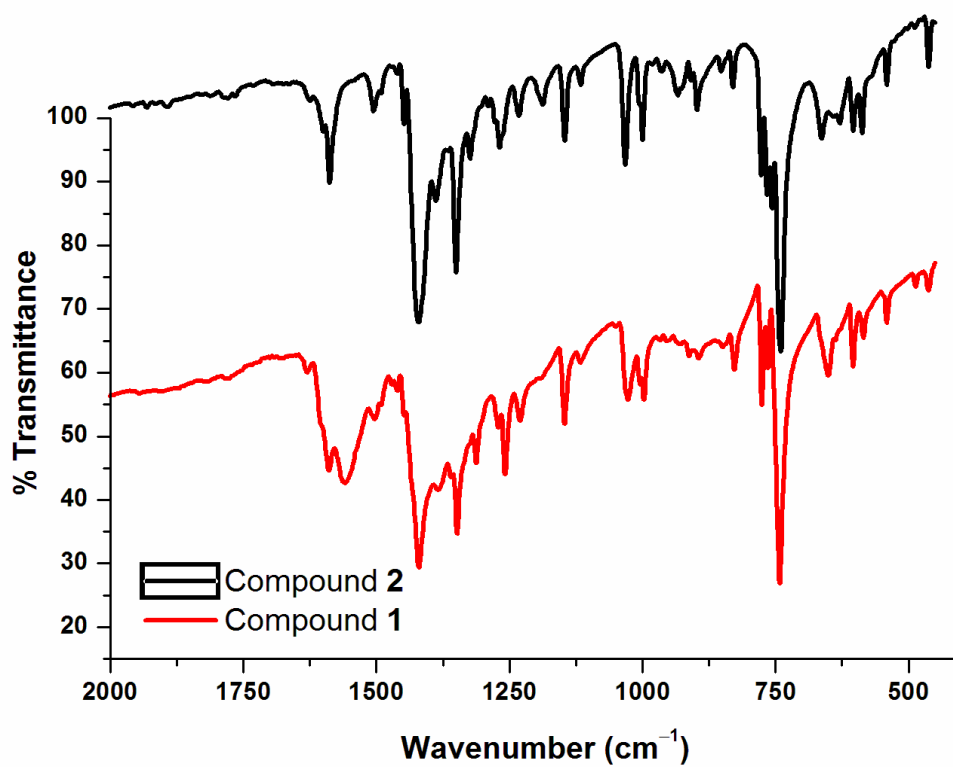

**Fig. S1** FTIR spectra of compounds 1 and 2.

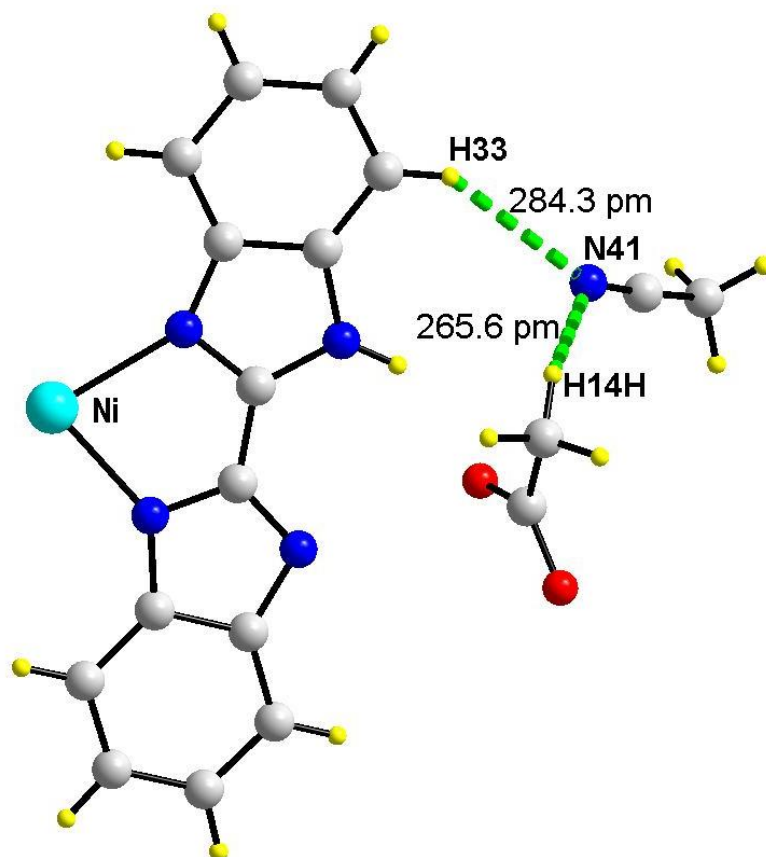

**Fig. S2** Weak hydrogen bonding interactions (C–H···N) between the nitrogen atom (blue) of the CH<sub>3</sub>CN molecule in **1** and C–H moieties of bisbenzimidazole ligand and acetate ion.

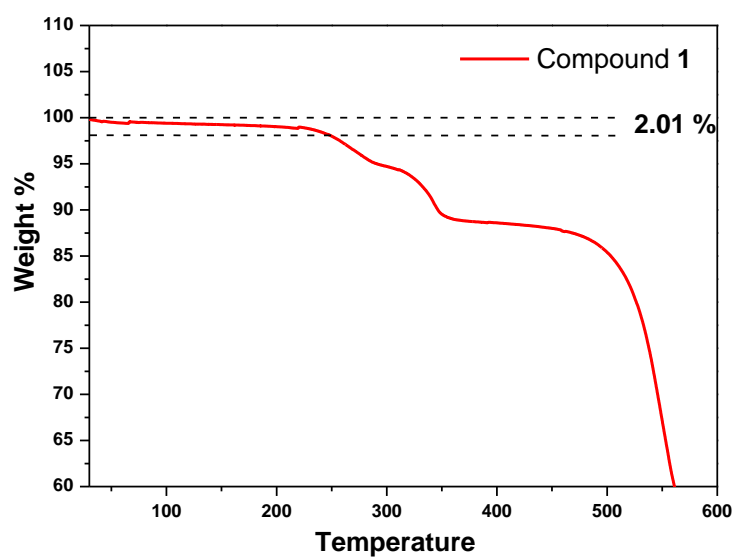

**Fig. S3** Magnified view of the TGA curve for compound **1**.

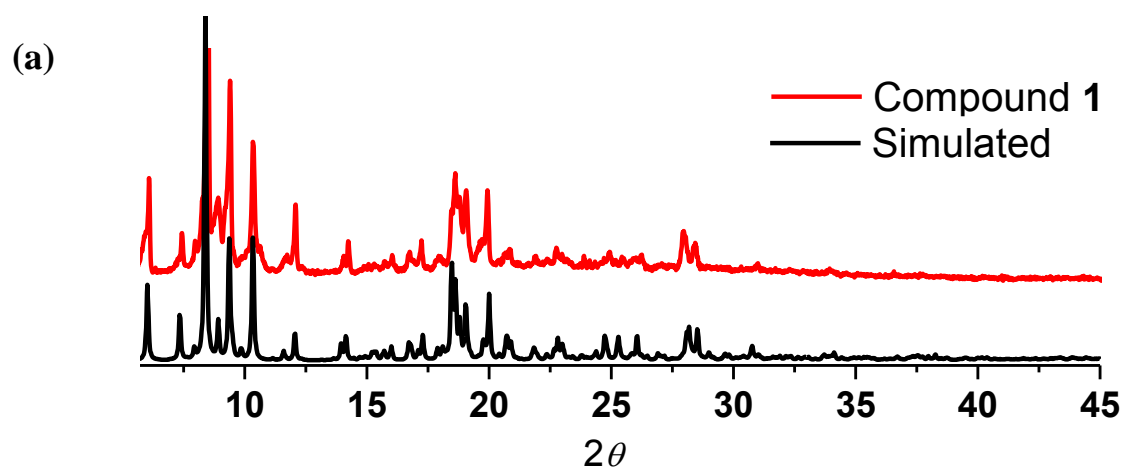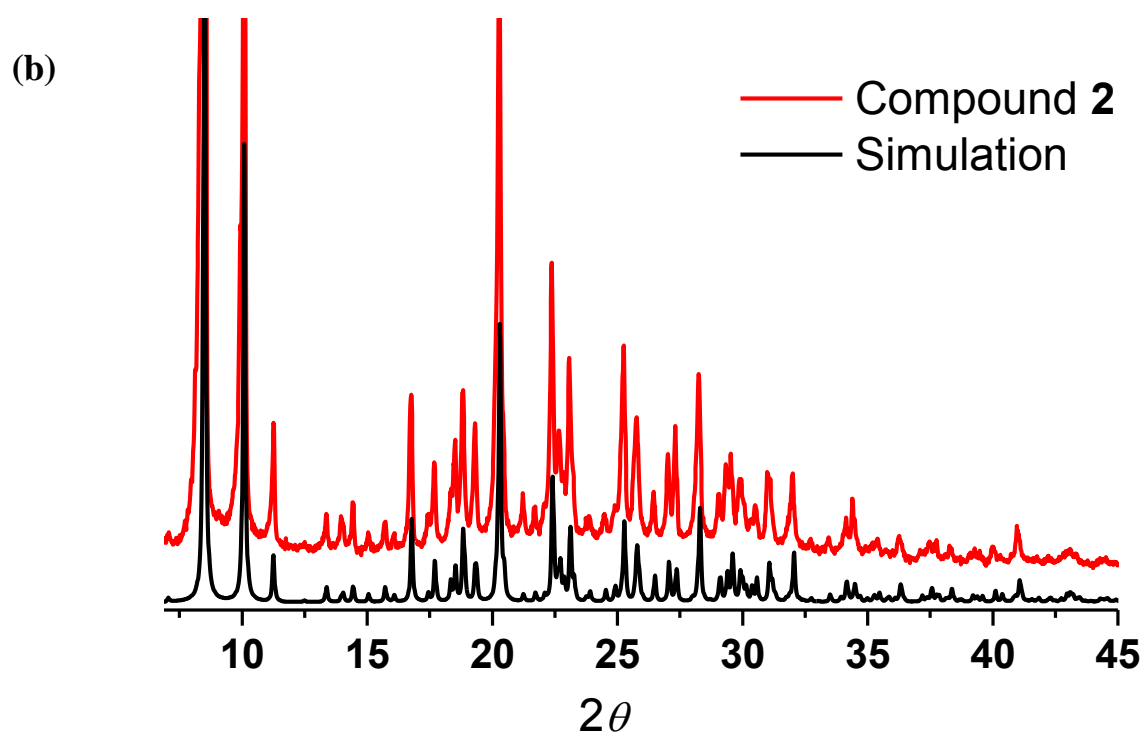

Fig. S4 (a) PXRD pattern of **1**, (b) PXRD pattern of **2**.

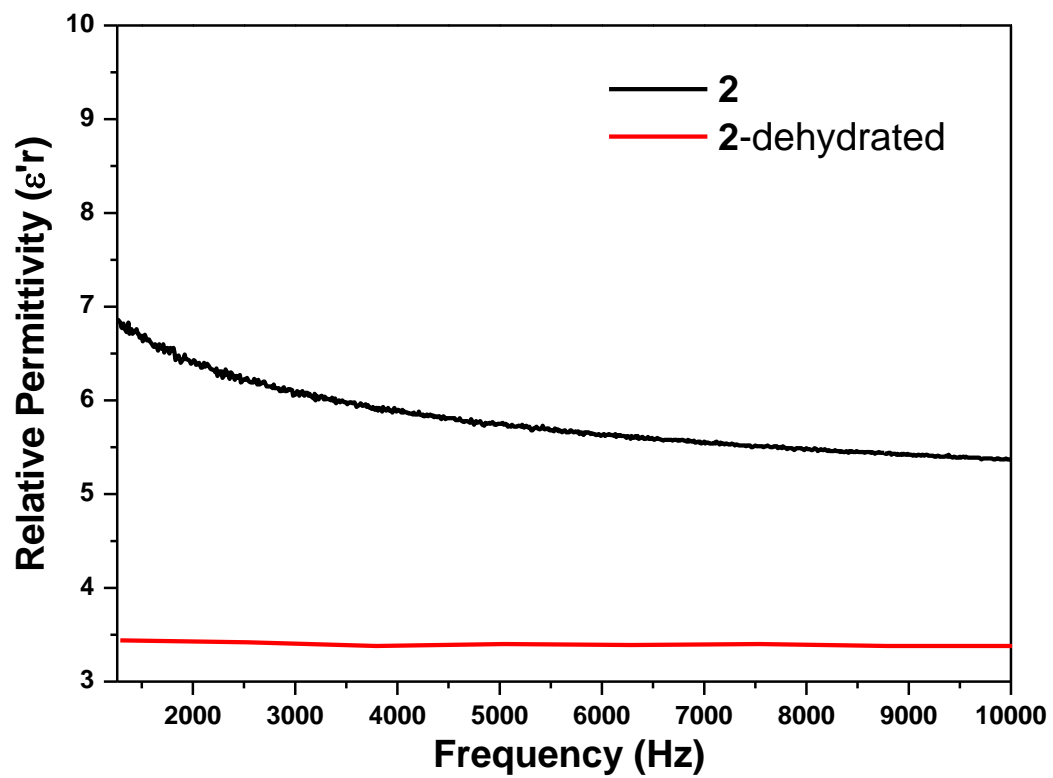

Fig. S5 Variation of dielectric constant in **2** on dehydration.

**Table S1** Bond lengths (Å) and angles (°) around Ni(II) ion in **1**

|             |            |             |            |
|-------------|------------|-------------|------------|
| Ni(1)–N(10) | 2.102(4)   | Ni(2)–N(4)  | 2.089(4)   |
| Ni(1)–N(6)  | 2.110(4)   | Ni(2)–N(13) | 2.106(4)   |
| Ni(1)–N(5)  | 2.114(5)   | Ni(2)–N(14) | 2.113(4)   |
| Ni(1)–N(1)  | 2.115(4)   | Ni(2)–N(17) | 2.124(4)   |
| Ni(1)–N(2)  | 2.135(4)   | Ni(2)–N(18) | 2.143(4)   |
| Ni(1)–N(9)  | 2.169(4)   | Ni(2)–N(3)  | 2.153(4)   |
|             |            |             |            |
| Ni(3)–N(26) | 2.085(4)   | Ni(4)–N(34) | 2.100(4)   |
| Ni(3)–N(21) | 2.091(4)   | Ni(4)–N(37) | 2.106(4)   |
| Ni(3)–N(25) | 2.110(4)   | Ni(4)–N(23) | 2.127(4)   |
| Ni(3)–N(30) | 2.119(4)   | Ni(4)–N(24) | 2.128(4)   |
| Ni(3)–N(29) | 2.149(4)   | Ni(4)–N(33) | 2.135(4)   |
| Ni(3)–N(22) | 2.169(4)   | Ni(4)–N(38) | 2.161(4)   |
|             |            |             |            |
| N10–Ni1–N6  | 100.36(18) | N4–Ni2–N13  | 169.65(15) |
| N10–Ni1–N5  | 173.11(16) | N4–Ni2–N14  | 94.45(15)  |
| N6–Ni1–N5   | 78.66(19)  | N13–Ni2–N14 | 78.60(15)  |
| N10–Ni1–N1  | 91.22(15)  | N4–Ni2–N17  | 90.28(15)  |
| N6–Ni1–N1   | 166.03(17) | N13–Ni2–N17 | 97.28(16)  |
| N5–Ni1–N1   | 90.76(17)  | N14–Ni2–N17 | 173.49(16) |
| N10–Ni1–N2  | 94.41(15)  | N4–Ni2–N18  | 97.56(15)  |
| N6–Ni1–N2   | 88.98(15)  | N13–Ni2–N18 | 90.91(15)  |
| N5–Ni1–N2   | 92.39(16)  | N14–Ni2–N18 | 96.60(15)  |
| N1–Ni1–N2   | 82.30(14)  | N17–Ni2–N18 | 78.32(15)  |
| N10–Ni1–N9  | 78.54(16)  | N4–Ni2–N3   | 82.31(14)  |
| N6–Ni1–N9   | 91.72(15)  | N13–Ni2–N3  | 89.92(15)  |
| N5–Ni1–N9   | 94.65(16)  | N14–Ni2–N3  | 89.61(15)  |
| N1–Ni1–N9   | 98.28(15)  | N17–Ni2–N3  | 95.46(16)  |
| N2–Ni1–N9   | 172.93(16) | N18–Ni2–N3  | 173.78(16) |

|             |            |             |            |
|-------------|------------|-------------|------------|
| N26–Ni3–N21 | 171.10(15) | N34–Ni4–N37 | 169.64(15) |
| N26–Ni3–N25 | 79.38(16)  | N34–Ni4–N23 | 95.11(15)  |
| N21–Ni3–N25 | 96.51(16)  | N37–Ni4–N23 | 92.48(15)  |
| N26–Ni3–N30 | 95.39(16)  | N34–Ni4–N24 | 94.50(15)  |
| N21–Ni3–N30 | 89.75(15)  | N37–Ni4–N24 | 93.47(14)  |
| N25–Ni3–N30 | 170.35(17) | N23–Ni4–N24 | 82.50(14)  |
| N26–Ni3–N29 | 90.00(16)  | N34–Ni4–N33 | 79.05(15)  |
| N21–Ni3–N29 | 98.14(15)  | N37–Ni4–N33 | 94.03(15)  |
| N25–Ni3–N29 | 93.06(18)  | N23–Ni4–N33 | 89.24(14)  |
| N30–Ni3–N29 | 78.74(19)  | N24–Ni4–N33 | 169.07(15) |
| N26–Ni3–N22 | 90.40(15)  | N34–Ni4–N38 | 93.03(14)  |
| N21–Ni3–N22 | 81.31(14)  | N37–Ni4–N38 | 79.25(14)  |
| N25–Ni3–N22 | 84.55(15)  | N23–Ni4–N38 | 171.72(15) |
| N30–Ni3–N22 | 103.72(16) | N24–Ni4–N38 | 98.41(14)  |
| N29–Ni3–N22 | 177.45(18) | N33–Ni4–N38 | 90.79(14)  |

**Table S2** Bond lengths (Å) and angles (°) around Ni(II) ion in **2**

|                                      |            |                                      |           |
|--------------------------------------|------------|--------------------------------------|-----------|
| Ni(1)–N(4)                           | 2.076(2)   | Ni(1)–N(1) <sup>i</sup>              | 2.108(2)  |
| Ni(1)–N(4) <sup>i</sup>              | 2.076(2)   | Ni(1)–N(5)                           | 2.149(2)  |
| Ni(1)–N(1)                           | 2.108(2)   | Ni(1)–N(5) <sup>i</sup>              | 2.149(2)  |
|                                      |            |                                      |           |
| N4–Ni1–N4 <sup>i</sup>               | 169.76(12) | N1 <sup>i</sup> –Ni1–N5              | 92.38(8)  |
| N4–Ni1–N1                            | 79.40(8)   | N4–Ni1–N5 <sup>i</sup>               | 91.91(8)  |
| N4 <sup>i</sup> –Ni1–N1              | 93.79(8)   | N4 <sup>i</sup> –Ni1–N5 <sup>i</sup> | 96.04(8)  |
| N4–Ni1–N1 <sup>i</sup>               | 93.79(8)   | N1–Ni1–N5 <sup>i</sup>               | 92.38(8)  |
| N4 <sup>i</sup> –Ni1–N1 <sup>i</sup> | 79.40(8)   | N1 <sup>i</sup> –Ni1–N5 <sup>i</sup> | 169.48(8) |
| N1–Ni1–N1 <sup>i</sup>               | 97.35(11)  | N5–Ni1–N5 <sup>i</sup>               | 78.21(13) |
| N4–Ni1–N5                            | 96.04(8)   |                                      |           |
| N4 <sup>i</sup> –Ni1–N5              | 91.91(8)   |                                      |           |
| N1–Ni1–N5                            | 169.48(8)  |                                      |           |

Symmetry transformations used to generate equivalent atoms (i) 1.5-x, y, -z
